# Supplementary material
Source: PubMed Central journal article supplement (PMC5823786)
Supplement: NIHMS942885-supplement-supplemental_file.pdf [file NIHMS942885-supplement-supplemental_file.pdf]

Supplementary eTable 1. Psychotropic Medications Discontinued Prior to Starting Trial

| Randomization Group | Participant             | Medication              | Dose           |
|---------------------|-------------------------|-------------------------|----------------|
| IPSRT +PLACEBO      | 1                       | Trazodone               | 200 mg qhs     |
|                     |                         | Bupropion               | 300 mg daily   |
|                     |                         | Sertraline              | 150 mg daily   |
|                     | 2                       | Sertraline              | 100 mg daily   |
|                     | 3                       | Aripiprazole            | 5 mg daily     |
|                     |                         | Bupropion               | 150 mg daily   |
|                     |                         | Desvenlafaxine          | 100 mg daily   |
|                     | 4                       | Citalopram              | 20 mg daily    |
|                     |                         | Valproate               | 1000 mg daily  |
|                     | 5                       | Eszopiclone             | 1 mg qhs prn   |
|                     |                         | Temazepam               | 1 mg qhs prn   |
|                     |                         | Vilazodone              | 40 mg qhs      |
|                     | 6                       | Mixed amphetamine salts | 5 mg daily     |
|                     |                         | Lithium carbonate       | 900 mg daily   |
|                     |                         | Trazodone               | 50 mg qhs prn  |
|                     | 7                       | Duloxetine              | 30 mg daily    |
| 8                   | Mixed amphetamine salts | 20 mg daily             |                |
| 9                   | Bupropion               | 100 mg daily            |                |
|                     | Alprazolam              | 0.25 mg daily prn       |                |
| 10                  | Alprazolam              | 0.25 mg daily prn       |                |
| 11                  | Aripiprazole            | 1 mg daily              |                |
|                     | Citalopram              | 20 mg daily             |                |
| IPSRT + QUETIAPINE  | 13                      | Escitalopram            | 10 mg daily    |
|                     | 14                      | Sertraline              | 50 mg daily    |
|                     | 15                      | Citalopram              | 30 mg daily    |
|                     | 16                      | Duloxetine              | 60 mg daily    |
|                     | 17                      | Sertraline              | 200 mg daily   |
|                     | 18                      | Zolpidem                | 2.5 mg qhs prn |

Supplementary eFigure 1. Estimated change in Body Mass Index (BMI) values Using Mixed-Effect Models (a)

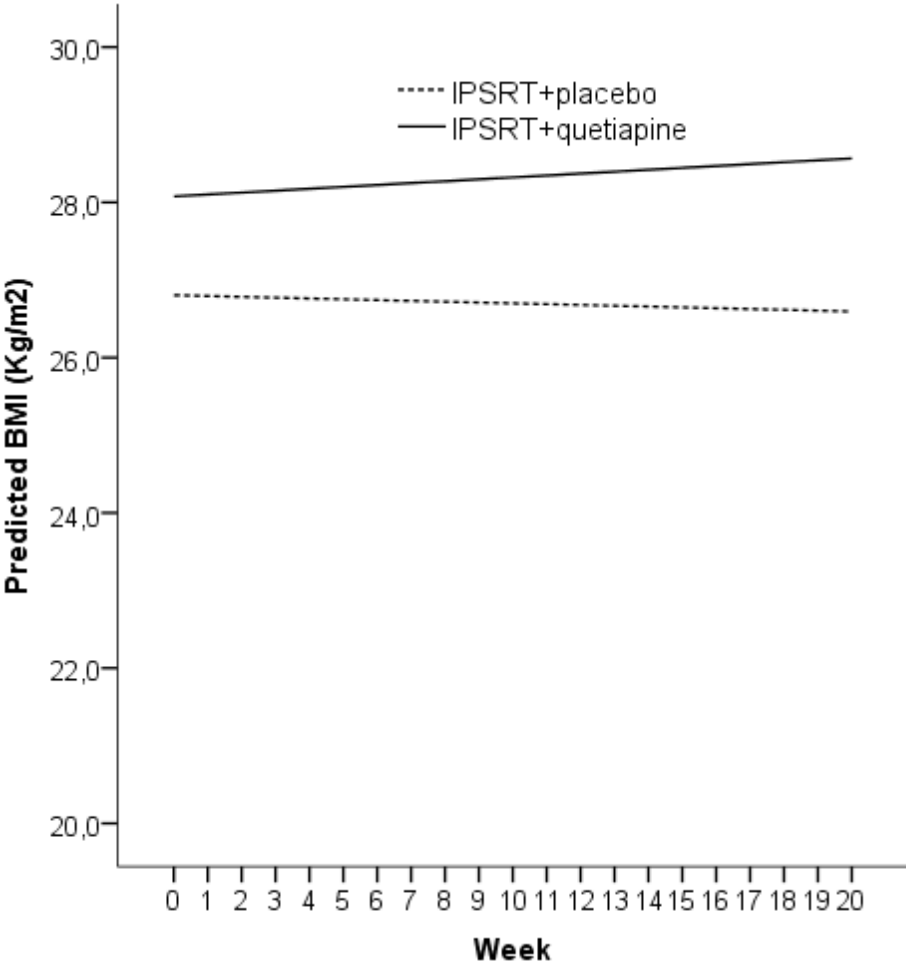

(a) ( $F=6.671$ ,  $df=67.96$ ;  $p=.012$ ) The curves represent an estimated linear model

Supplementary eFigure 2. Baseline Young Mania Rating Scale (YMRS) as Moderator of Treatment Response (a)

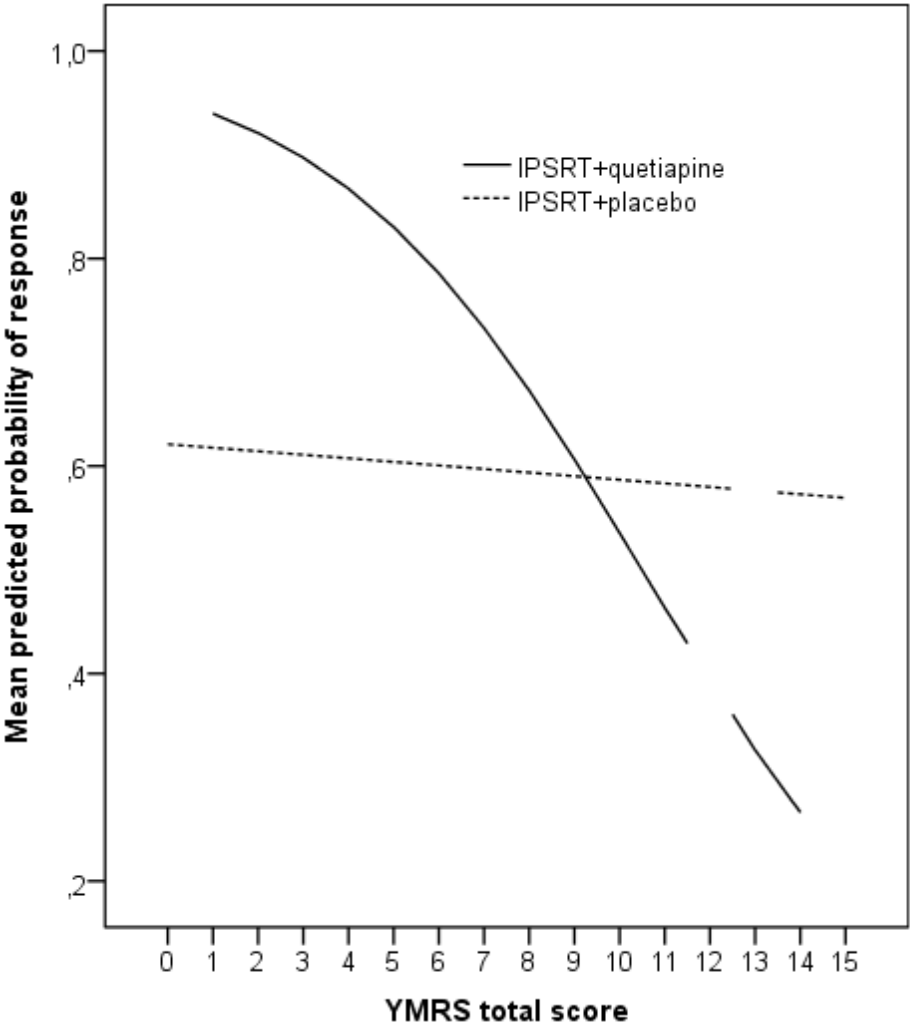

(a) Curves show decreased predicted probability of response to IPSRT plus quetiapine compared to IPSRT plus placebo with > 9 hypomanic symptoms (OR=0.872, 95% CI= 0.760-0.999, p=.048)
